# Supplementary material
Source: publisher site journal article supplement (https://www.dovepress.com/article/370657)
Supplement: Supplementary file 1 [file get_supplementary_file.php]

## Supplementary materials

## Measurement items

## Section 1: Expectations from conference apps

| STATEMENTS                                                                                     | Strongly Disagree | Disagree | Somewhat Disagree | Neither Agree nor Disagree | Somewhat Agree | Agree | Strongly Agree |
|------------------------------------------------------------------------------------------------|-------------------|----------|-------------------|----------------------------|----------------|-------|----------------|
| Using conference apps increases my chances of achieving things important to me in a conference | ○                 | ○        | ○                 | ○                          | ○              | ○     | ○              |
| Using conference apps helps me accomplish things more quickly in a conference                  | ○                 | ○        | ○                 | ○                          | ○              | ○     | ○              |
| Using conference apps increases my productivity in a conference                                | ○                 | ○        | ○                 | ○                          | ○              | ○     | ○              |
| Learning how to use conference apps is easy for me                                             | ○                 | ○        | ○                 | ○                          | ○              | ○     | ○              |
| I find conference apps easy to use                                                             | ○                 | ○        | ○                 | ○                          | ○              | ○     | ○              |
| It is easy for me to become skillful using conference apps                                     | ○                 | ○        | ○                 | ○                          | ○              | ○     | ○              |
| I have the resources necessary to use conference apps                                          | ○                 | ○        | ○                 | ○                          | ○              | ○     | ○              |
| I have the knowledge necessary to use conference apps                                          | ○                 | ○        | ○                 | ○                          | ○              | ○     | ○              |
| Conference apps are compatible with other technologies I use                                   | ○                 | ○        | ○                 | ○                          | ○              | ○     | ○              |
| I can get help from conference staff if I have difficulty using conference apps                | ○                 | ○        | ○                 | ○                          | ○              | ○     | ○              |

## Section 2: Influence of others on conference apps adoption

[illegible]

### Section 3: Hedonic motivation to adopt conference apps

[illegible]

#### Section 4: Habit of using conference apps

[illegible]
